# Supplementary material for: Multimorbidity and catastrophic health expenditure among patients with diabetes in China: a nationwide population-based study
Source: PubMed Central journal article supplement — BMJ Glob Health. 2022 Feb 9;7(2):e007714. doi: 10.1136/bmjgh-2021-007714 (PMC8830259; doi:10.1136/bmjgh-2021-007714), 2022-02-09
Supplement: bmjgh-2021-007714supp001.pdf [file bmjgh-2021-007714supp001.pdf]

## Supplementary Table

**Supplementary Table S1.** Odds ratios of catastrophic health expenditure by characteristic of diabetes patients

|                                  | Odds ratio (95% CI) | P value |
|----------------------------------|---------------------|---------|
| Number of chronic diseases       | 1.44 (1.37-1.53)    | <0.001  |
| Age, per 5 years                 | 1.11 (1.07-1.14)    | <0.001  |
| Sex                              |                     |         |
| Male                             | 1 (ref)             |         |
| Female                           | 0.78 (0.70-0.88)    | <0.001  |
| School education level           |                     |         |
| Primary school and below         | 1 (ref)             |         |
| Secondary school                 | 0.83 (0.74-0.94)    | 0.002   |
| Junior college and above         | 0.44 (0.35-0.56)    | <0.001  |
| Employment status                |                     |         |
| Employed                         | 1 (ref)             |         |
| Retired                          | 1.51 (1.26-1.80)    | <0.001  |
| Student                          | 2.49 (0.45-13.85)   | 0.298   |
| Unemployed                       | 1.78 (1.24-2.56)    | 0.002   |
| Jobless†                         | 1.59 (1.36-1.86)    | <0.001  |
| Smoking status                   |                     |         |
| Daily smoker                     | 1 (ref)             |         |
| Occasional smoker                | 1.45 (1.04-2.03)    | 0.029   |
| Non-smoker                       | 1.39 (1.19-1.63)    | <0.001  |
| Frequency of alcohol consumption |                     |         |
| At least 3 times a week          | 1 (ref)             |         |
| 1 or 2 times a week              | 1.15 (0.80-1.66)    | 0.449   |
| Less than once a week            | 1.56 (1.15-2.12)    | 0.004   |
| No drinking                      | 1.84 (1.47-2.30)    | <0.001  |
| Physical examination             |                     |         |
| Yes                              | 1 (ref)             |         |
| No                               | 1.06 (0.96-1.18)    | 0.227   |
| Health insurance                 |                     |         |
| No public health insurance       | 1 (ref)             |         |
| UEBMI                            | 0.90 (0.62-1.32)    | 0.588   |
| URBMI                            | 0.94 (0.65-1.38)    | 0.762   |
| NRCMS                            | 1.17 (0.80-1.70)    | 0.420   |
| Other*                           | 0.94 (0.42-2.08)    | 0.877   |
| Socioeconomic status             |                     |         |
| Quartile 1 (lowest)              | 1 (ref)             |         |
| Quartile 2                       | 1.04 (0.90-1.20)    | 0.597   |
| Quartile 3                       | 1.18 (1.02-1.36)    | 0.023   |
| Quartile 4 (highest)             | 1.38 (1.19-1.60)    | <0.001  |
| Region                           |                     |         |

|                                   |                  |        |
|-----------------------------------|------------------|--------|
| East                              | 1 (ref)          |        |
| Central                           | 1.08 (0.96-1.21) | 0.179  |
| West                              | 1.16 (1.03-1.32) | 0.017  |
| Number of people in the household | 0.83 (0.80-0.86) | <0.001 |
| Impoverished                      |                  |        |
| Yes                               | 1 (ref)          |        |
| No                                | 0.58 (0.46-0.75) | <0.001 |

†Jobless includes urban and rural residents who cannot be employed due to disability or long-term bedridden illness or beyond the working age, while unemployed refers to those who have the ability to work but have not been given employment opportunities.

\*Includes Government Employee Health Insurance and Government Labor Health Insurance. Abbreviations: CI, confidence interval; NRCMS, New Rural Cooperative Medical Scheme; UEBMI, Urban Employee Basic Medical insurance; URBMI, Urban Resident Basic Medical insurance.
